# Supplementary material for: Serum interleukin-30 level in patients with psoriasis and its correlation with psoriasis severity: a case-control study
Source: PubMed Central journal article supplement — J Int Med Res. 2021 Apr 26;49(4):03000605211004039. doi: 10.1177/03000605211004039 (PMC8753790; doi:10.1177/03000605211004039), 2021-04-26
Supplement: sj-pdf-2-imr-10.1177_03000605211004039.pdf [file sj-pdf-2-imr-10.1177_03000605211004039.pdf]

**Supplementary Table: Mann-Whitney test results comparing the mean rank of IL-30 of the psoriatic patients and control groups**

| <b>Group</b>     | <b>N</b> | <b>Mean IL-30</b> | <b>(±SD)</b> | <b>Mean Rank</b> | <b><i>P</i>*</b> |
|------------------|----------|-------------------|--------------|------------------|------------------|
| <b>Psoriasis</b> | 26       | 111.96            | (±149.66)    | 890.00           | < 0.001          |
| <b>Control</b>   | 26       | 33.76             | (±56.48)     | 488.00           |                  |

\*By Mann-Whitney test.
